# Supplementary material
Source: Springer Nature journal article supplement (https://www.springermedizin.de/resource/supplementary/12963_2008_72_MOESM3_ESM.pdf/9572630)

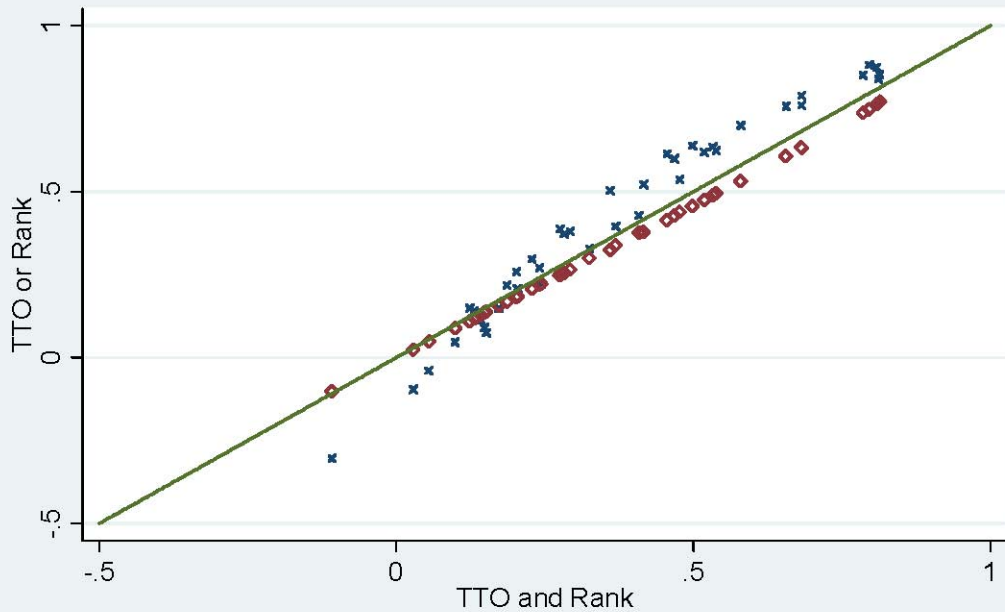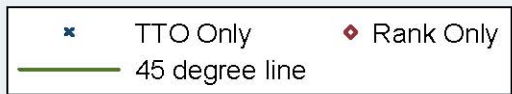

Supplement: MOESM3 [file 9572630]
